# Supplementary material
Source: PubMed Central journal article supplement (PMC2711226)

Figure S1

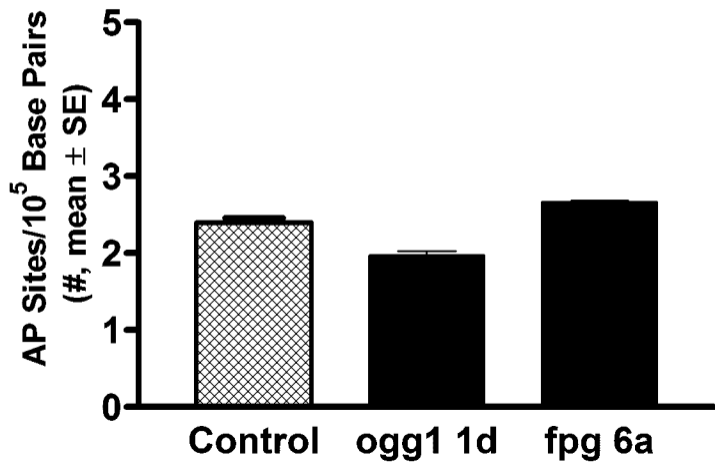

Figure S2

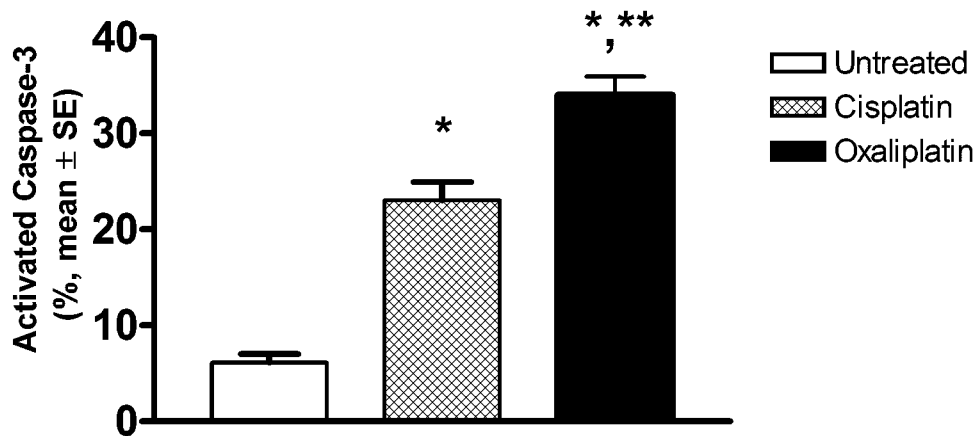

Supplement: NIHMS119603-supplement-supplement_1.pdf [file NIHMS119603-supplement-supplement_1.pdf]
